# Supplementary material for: Postharvest biochemical characteristics and ultrastructure of Coprinus comatus
Source: PeerJ. 2020 Feb 5;8:e8508. doi: 10.7717/peerj.8508 (PMC7007737; doi:10.7717/peerj.8508)
Supplement: Supplemental Information 3 [file peerj-08-8508-s003.csv]

## Sheet: Sheet1
Storage time(d)	The color difference value of stipe	The color difference value of cap	Weight loss ratio(%)	Electrolyte leakage(%)	Soluble protein(mg∙g-1∙Fw)	MDA(nmol/g)	O2•− production rate(umol/L)	SOD(U∙g-1∙Fw)	CAT(U∙g-1∙Fw)	POD(U∙g-1∙Fw)	Total phenolics(mg∙g-1∙Fw)	PPO(U∙g-1∙Fw)	Chitinase (10-9mol/s·g)	Cx(10-9mol/s·g)	PG(10-9mol/s·g)	β-1,3-glucanase(10-9mol/s·g)
0	0.71	1.78	0	15.2	3.78	0.2	8.5	7.22	0.05	0.2795	0.73	3.23	3.69	4.37	0.94	1.17
0	2.3	3.02	0	14.9	3.78	0.19	7.97	6.28	0.06	0.274	0.75	4.08	3.66	4.29	1.36	1.29
0	1.21	4.52	0	15.8	3.77	0.19	7.94	5.33	0.07	0.2697	0.77	2.56	3.58	4.78	1.26	1.29
5	17.64	12.21	0.05	21.6	2.75	0.28	14.9	9.64	0.51	0.324	0.8	39.3	8.01	11.31	6.33	10.61
5	16.75	10.32	0.04	20.8	2.74	0.28	15.98	10.71	0.51	0.3251	0.79	49.88	7.71	11.31	6.08	10.64
5	16.76	10.95	0.05	21.7	2.57	0.27	16.95	6.12	0.52	0.326	0.76	43.83	6.74	11.03	6.51	10.39
10	21.6	28.17	0.18	25.9	2.34	0.24	21.4	30.93	5.7	0.3284	0.9	11.05	8.2	14.48	9.07	13.98
10	20.54	22.78	0.2	26.4	2.43	0.2	22.54	30.93	5.13	0.3315	0.94	10.7	7.98	14.46	8.05	15.12
10	27.92	32.12	0.22	26.8	2.38	0.24	20.11	32.98	6.23	0.3297	0.84	12.35	9.22	15.24	10.17	14.98
15	42.59	44.36	0.44	36.4	2.51	0.4	15.01	22.25	16.54	0.2921	0.83	85.67	7.74	13.89	9.02	13.51
15	47.76	55.28	0.54	35.9	2.61	0.47	17.01	21.46	15.16	0.3137	0.88	82.56	8.52	14.05	9.29	13.57
15	42.85	45.77	0.41	36.1	2.64	0.4	16.05	17.02	16.51	0.3253	0.85	70.1	7.82	14.24	9.17	12.55
20	52.41	61.5	0.72	38.4	2.23	0.22	28.26	11.57	11.47	0.278	0.82	64.28	7.19	9.82	9.43	10.8
20	52.35	57.07	0.93	37.9	2.29	0.22	28.19	6.78	13.57	0.281	0.88	53.75	5.98	9.85	8.02	10.37
20	61.77	55.14	0.83	38.2	2.32	0.28	28.17	7.97	11.74	0.284	0.84	57.96	6.67	9.82	8.36	10.82
